# Supplementary material for: Tuning the optical and magnetic properties of lanthanide single-ion magnets using nitro-functionalized trispyrazolylborate ligands
Source: Royal Society of Chemistry journal article supplement (doi:10.1039/d3dt01018j), 2023-01-01
Supplement: d3dt01018j1.pdf [file d3dt01018j1.pdf]

## Supporting Information

### Tuning the Optical and Magnetic Properties of Lanthanide Single-Ion Magnets using Nitro-functionalized Trispyrazolylborates

Christopher Hossack,<sup>1</sup> Folasade Abdul,<sup>1</sup> Christopher Cahill,<sup>1</sup> Claire Besson<sup>1,\*</sup>

#### Table of Contents

|                                         |     |
|-----------------------------------------|-----|
| Single Crystal Diffraction Data.....    | S1  |
| Powder X-Ray Diffraction Patterns ..... | S3  |
| Infrared Spectra .....                  | S4  |
| NMR Spectra .....                       | S5  |
| Thermogravimetric Analysis.....         | S9  |
| Diffuse Reflectance Spectra .....       | S10 |
| Computational Details.....              | S13 |
| Judd-Ofelt Analysis.....                | S16 |
| DC SQUID Data Fits and Parameters ..... | S17 |
| AC SQUID Data Fits and Parameters ..... | S20 |
| References .....                        | S21 |

## Single Crystal Diffraction Data

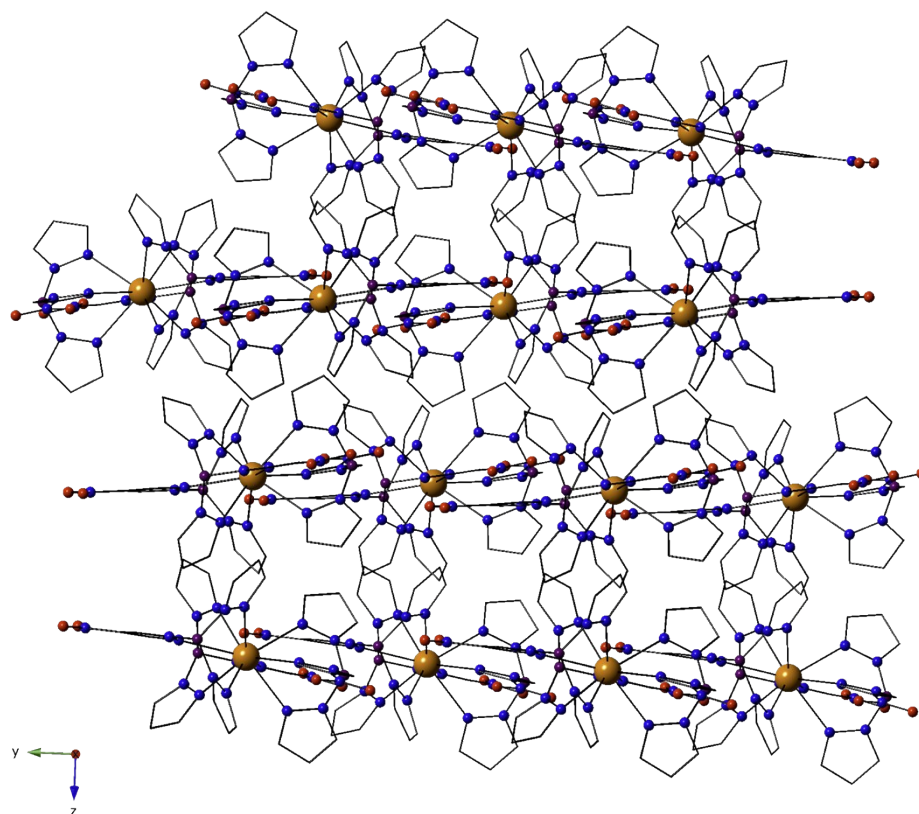

Figure S1: Packing diagram of  $\text{Ln}(4\text{-NO}_2\text{Tp})_3 \cdot \text{C}_6\text{H}_{14}$  polymorph (disordered hexane molecules were omitted for clarity) along  $[001]$  direction with hydrogen bonded sheets of  $\text{Ln}(4\text{-NO}_2\text{Tp})_3$  monomers stacking in a ABBA arrangement.

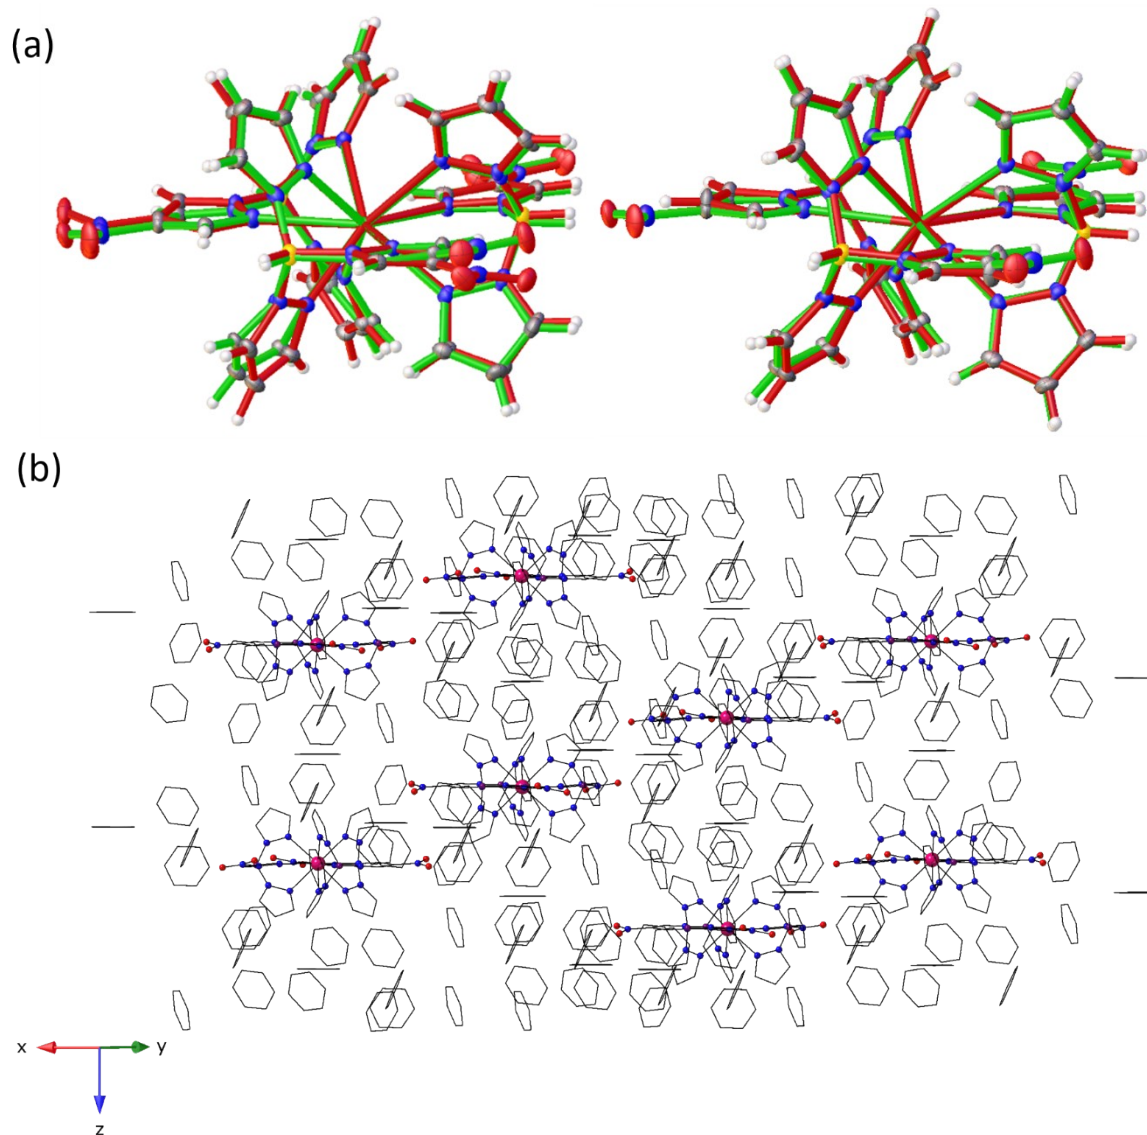

Figure S2: (a) Superposition of the structures of **5a** (green), **5b** (left, red) and [SmTp<sub>3</sub>]<sup>1</sup> (right, red). (b) Packing diagram of **5b** with benzene molecules displayed.

# Powder X-Ray Diffraction Patterns

## Compounds 1a – 9a

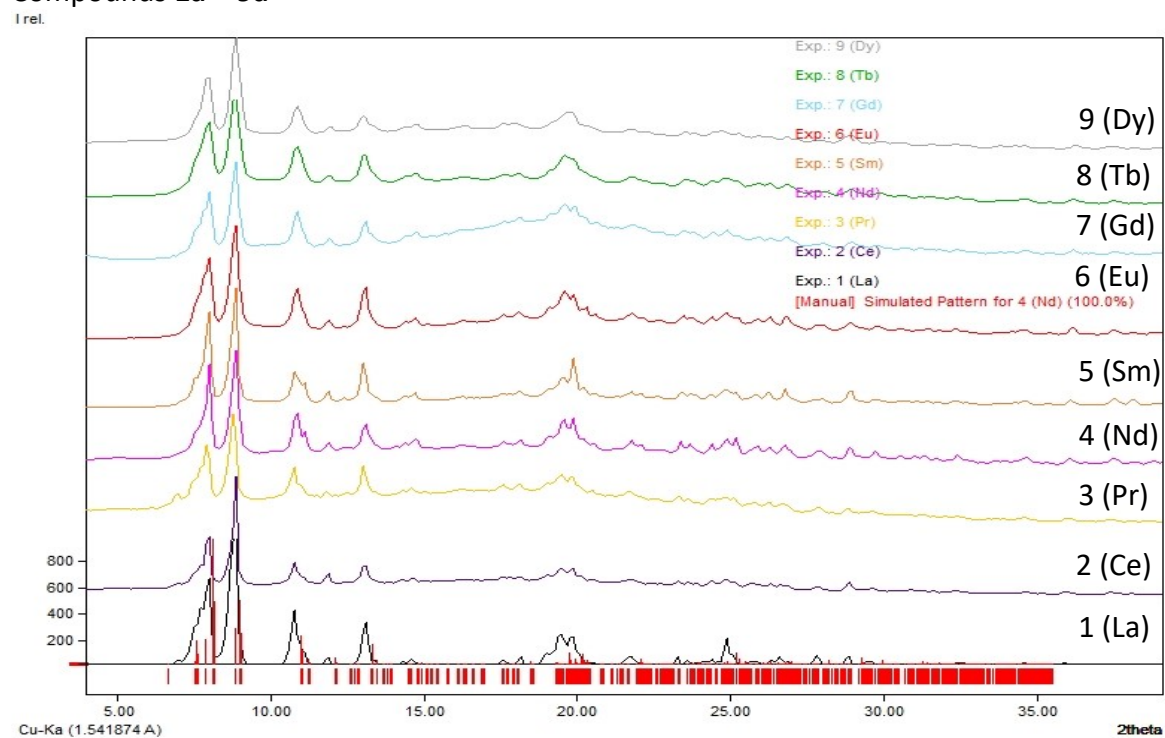

Figure S3: PXRD patterns of isomorphous compounds, a1 – 9a with the simulated pattern of 4a (red lines).

## Compounds 5b and 8b

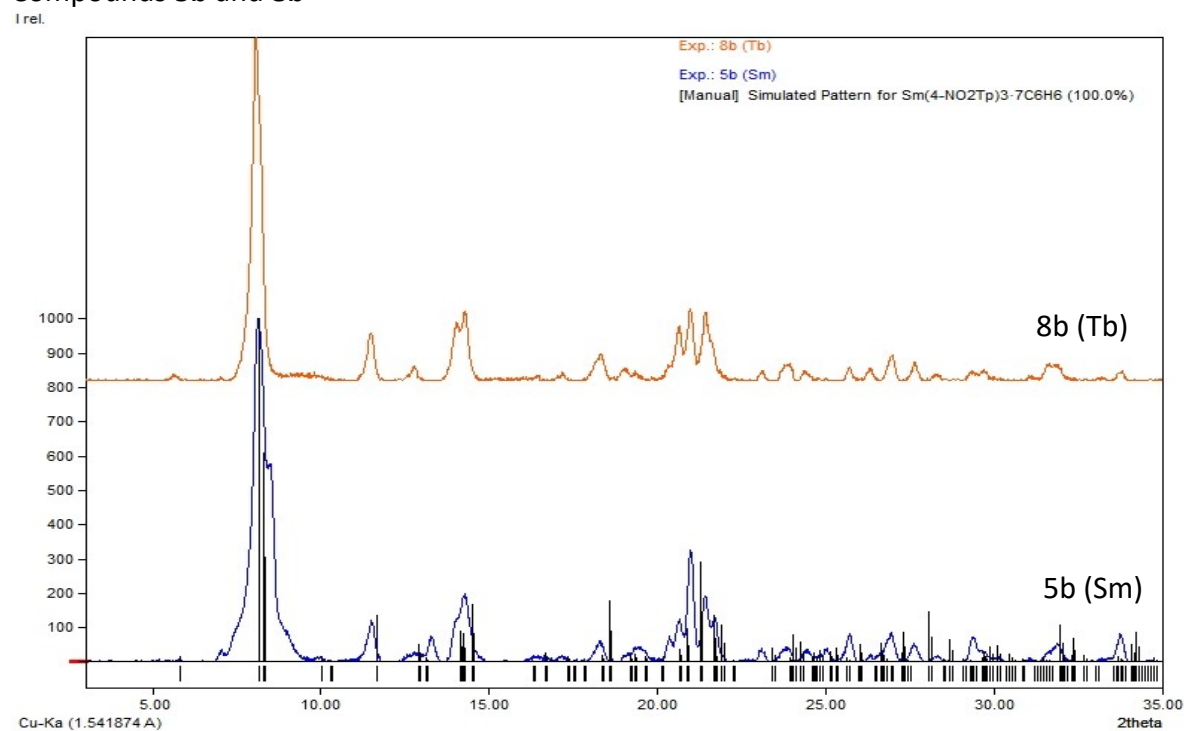

Figure S4: PXRD patterns of 5b and 8b with the simulated pattern of 5b (black lines).

## Infrared Spectra

### Compounds **1a** – **9a**

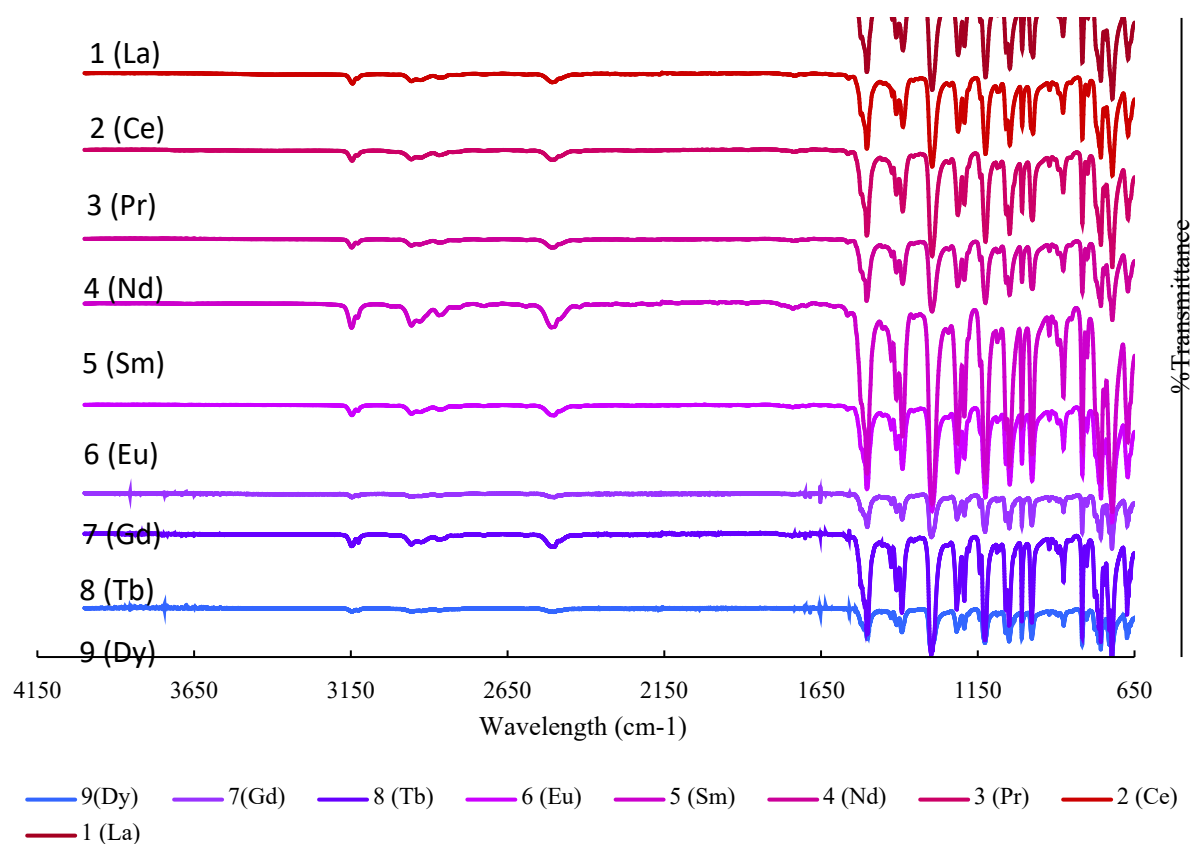

Figure S5: IR spectra (ATR) of **1a** – **9a**, [Ln(4-NO<sub>2</sub>Tp)<sub>3</sub>]·C<sub>6</sub>H<sub>14</sub>.

### Compounds **5b** and **8b**

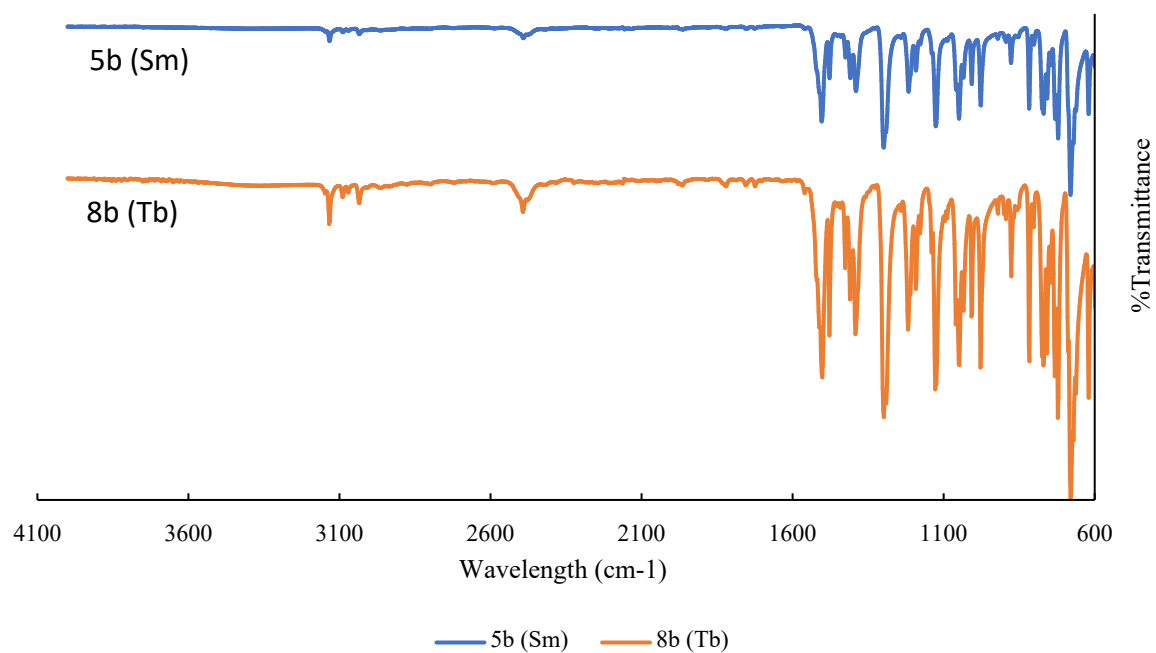

Figure S6: IR spectra (ATR) of **5b** and **8b**, [Ln(4-NO<sub>2</sub>Tp)<sub>3</sub>]·7 C<sub>6</sub>H<sub>6</sub>.

# NMR Spectra

## La(4-NO<sub>2</sub>Tp)<sub>3</sub>

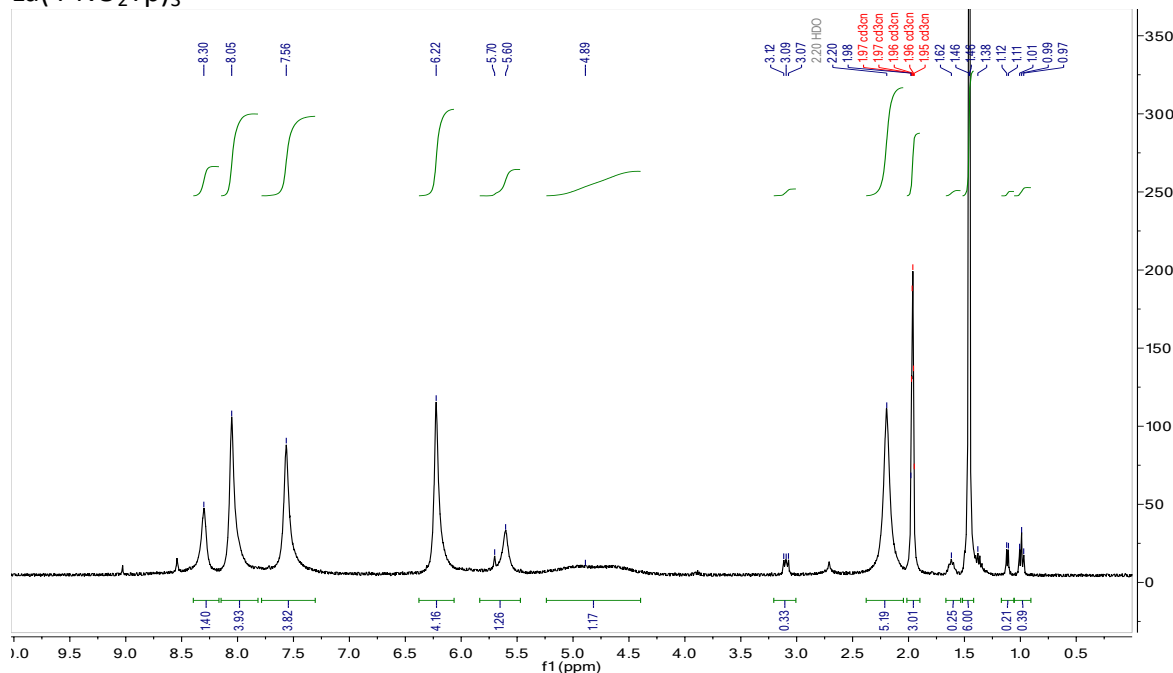

Figure S7: <sup>1</sup>H NMR (400 MHz, acetonitrile-d<sub>3</sub>) of crude La(4-NO<sub>2</sub>Tp)<sub>3</sub>. δ (ppm): 8.30 (s, 1H), 8.05 (s, 2H), 7.56 (s, 2H), 6.22 (s, 2H), 5.65 (d, 1H), 4.89 (s, 1H, BH), 2.20 (HDO), 1.98 (CD<sub>2</sub>HCN), 1.52 – 1.42 (cyclohexane). Low intensity peaks at 3.09, 1.62, 1.38 and 0.99 ppm correspond to trace amounts of [TBA]<sup>+</sup> from the ligand and at 1.12 ppm to <sup>i</sup>PrOH. δ = 8.30, 8.05, 7.56, 6.22, 5.65 ppm correspond to La(4-NO<sub>2</sub>Tp)<sub>3</sub>.

## Ce(4-NO<sub>2</sub>Tp)<sub>3</sub>

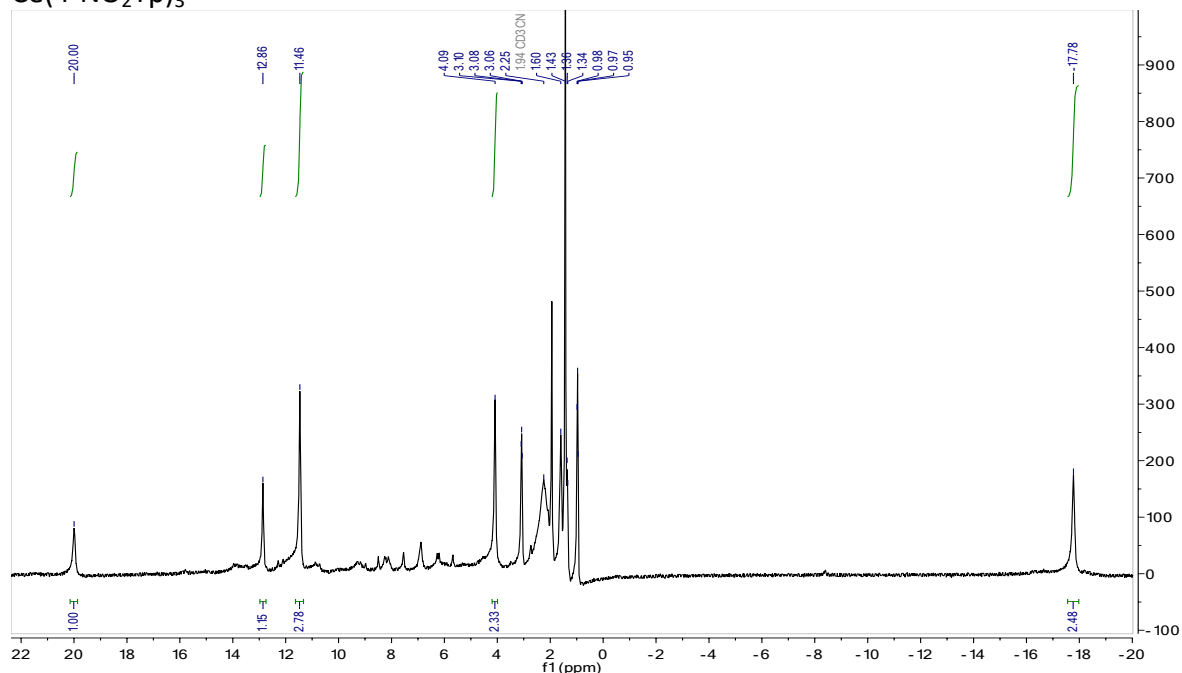

Figure S8: <sup>1</sup>H NMR (400 MHz, acetonitrile-d<sub>3</sub>) of crude Ce(4-NO<sub>2</sub>Tp)<sub>3</sub>. δ (ppm): 20.00 (s, 1H), 12.86 (s, 1H), 11.46 (s, 2H), 4.09 (s, 2H), 2.25 (HDO), 1.94 (CD<sub>2</sub>HCN), 1.43 (cyclohexane) and -17.78 (s, 2H). Low intensity peaks between 6 – 8 and at 3.10, 1.60, 1.34 and 0.97 ppm correspond to [TBA][4-NO<sub>2</sub>Tp]. δ = 20.00, 12.86, 11.46, 4.09, -17.78 ppm correspond to Ce(4-NO<sub>2</sub>Tp)<sub>3</sub>.

Pr(4-NO<sub>2</sub>Tp)<sub>3</sub>

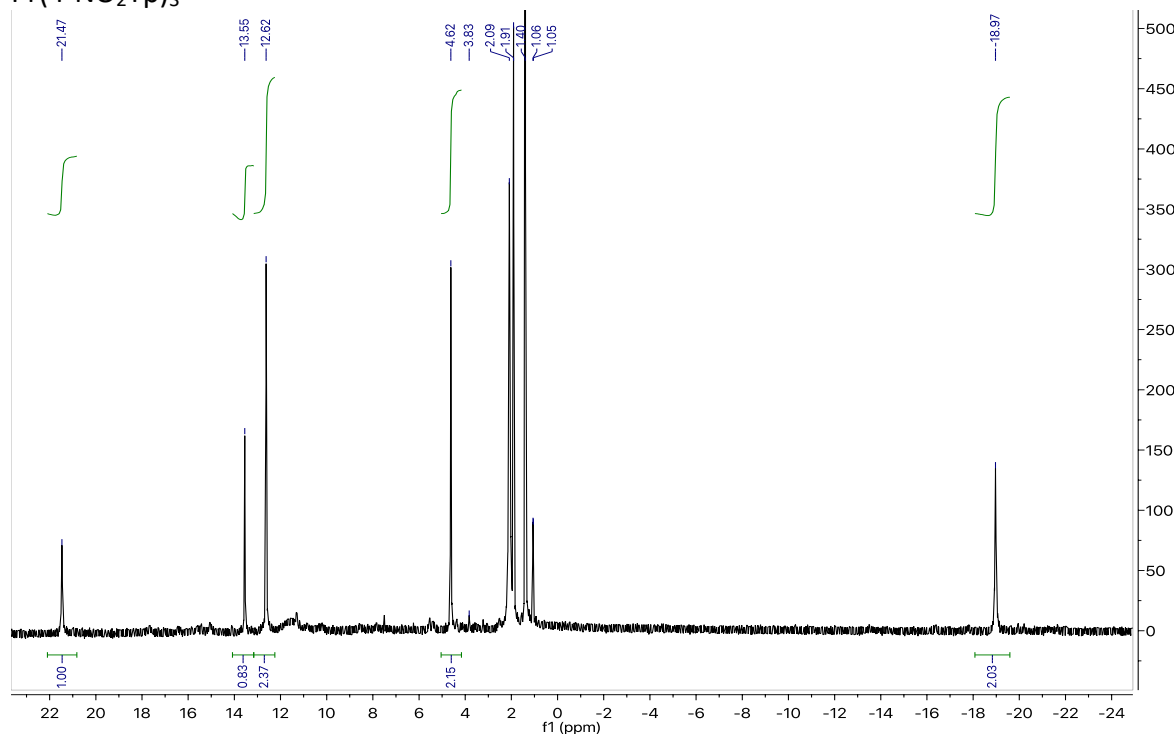

Figure S9: <sup>1</sup>H NMR (400 MHz, acetonitrile-d<sub>3</sub>) of crude Pr(4-NO<sub>2</sub>Tp)<sub>3</sub>. δ (ppm): 21.47 (s, 1H), 13.35 (s, 1H), 12.62 (s, 2H), 4.62 (s, 2H), 2.09 (HDO), 1.91 (CD<sub>2</sub>HCN), 1.40 (cyclohexane), 1.06 (<sup>1</sup>PrOH) and -18.87 (d, 2H). δ = 21.47, 13.35, 12.62, 4.62, -18.87 ppm correspond to Pr(4-NO<sub>2</sub>Tp)<sub>3</sub>.

Nd(4-NO<sub>2</sub>Tp)<sub>3</sub>

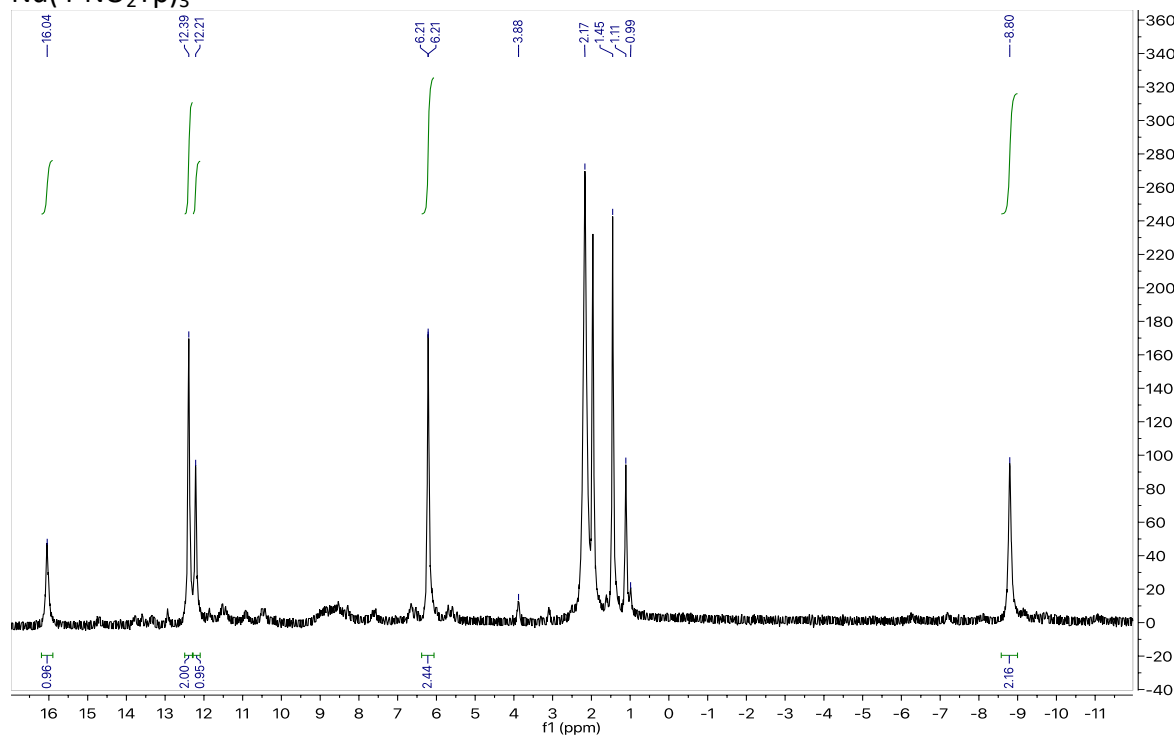

Figure S10: <sup>1</sup>H NMR (400 MHz, acetonitrile-d<sub>3</sub>) of crude Nd(4-NO<sub>2</sub>Tp)<sub>3</sub>. δ (ppm): 16.04 (s, 1H), 12.39 (s, 2H), 12.21 (s, 1H), 6.21 (m, 2H), 3.88 (<sup>1</sup>PrOH), 2.09 (HDO/CD<sub>2</sub>HCN), 1.45 (cyclohexane), 1.11 (<sup>1</sup>PrOH), 0.99 (residual tetrabutylammonium) and -8.80 (s, 2H). δ = 16.04, 12.39, 12.21, 6.21, -8.80 ppm correspond to Nd(4-NO<sub>2</sub>Tp)<sub>3</sub>.

### Sm(4-NO<sub>2</sub>Tp)<sub>3</sub>

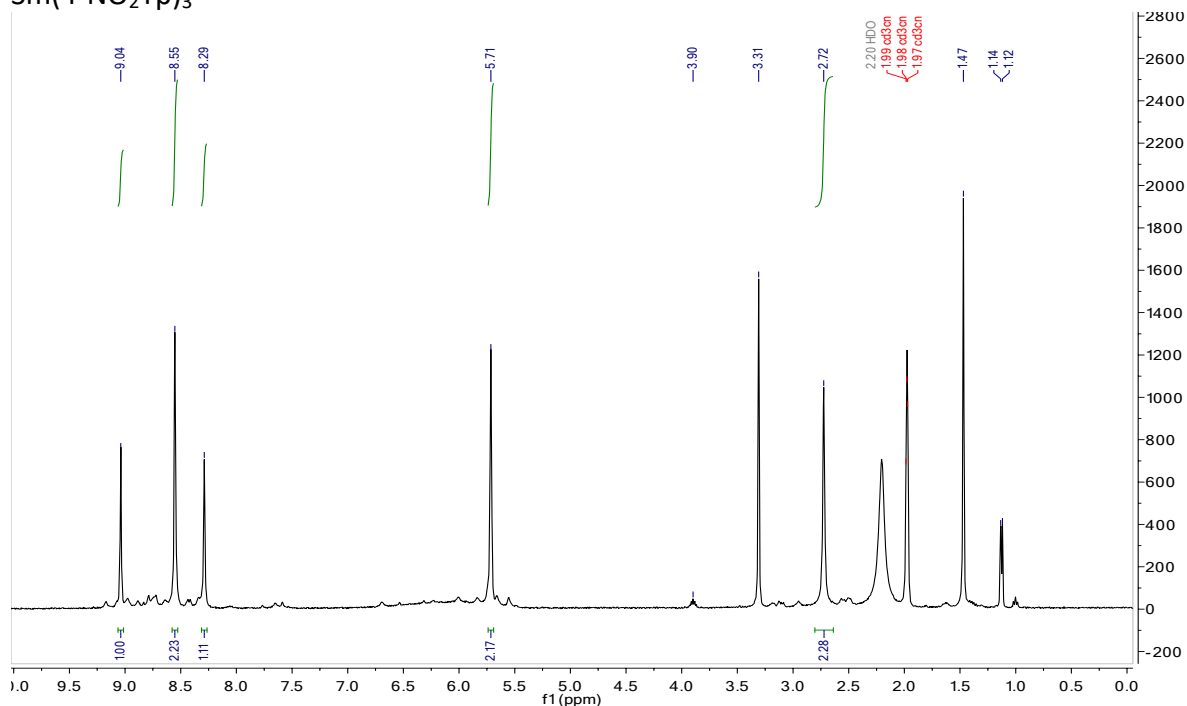

Figure S11: <sup>1</sup>H NMR (400 MHz, acetonitrile-d<sub>3</sub>) of crude Sm(4-NO<sub>2</sub>Tp)<sub>3</sub>. δ (ppm): 9.04 (s, 1H), 8.55 (s, 2H), 8.29 (s, 1H), 5.71 (m, 2H), 3.90 (iPrOH), 3.31 (MeOH), 2.72 (s, 2H), 2.20 (H<sub>2</sub>O), 1.98 (CD<sub>2</sub>H<sub>2</sub>CN), 1.47 (cyclohexane) and 1.11 (iPrOH). δ = 9.04, 8.55, 8.29, 5.71, 2.72 ppm correspond to Sm(4-NO<sub>2</sub>Tp)<sub>3</sub>.

### Eu(4-NO<sub>2</sub>Tp)<sub>3</sub>

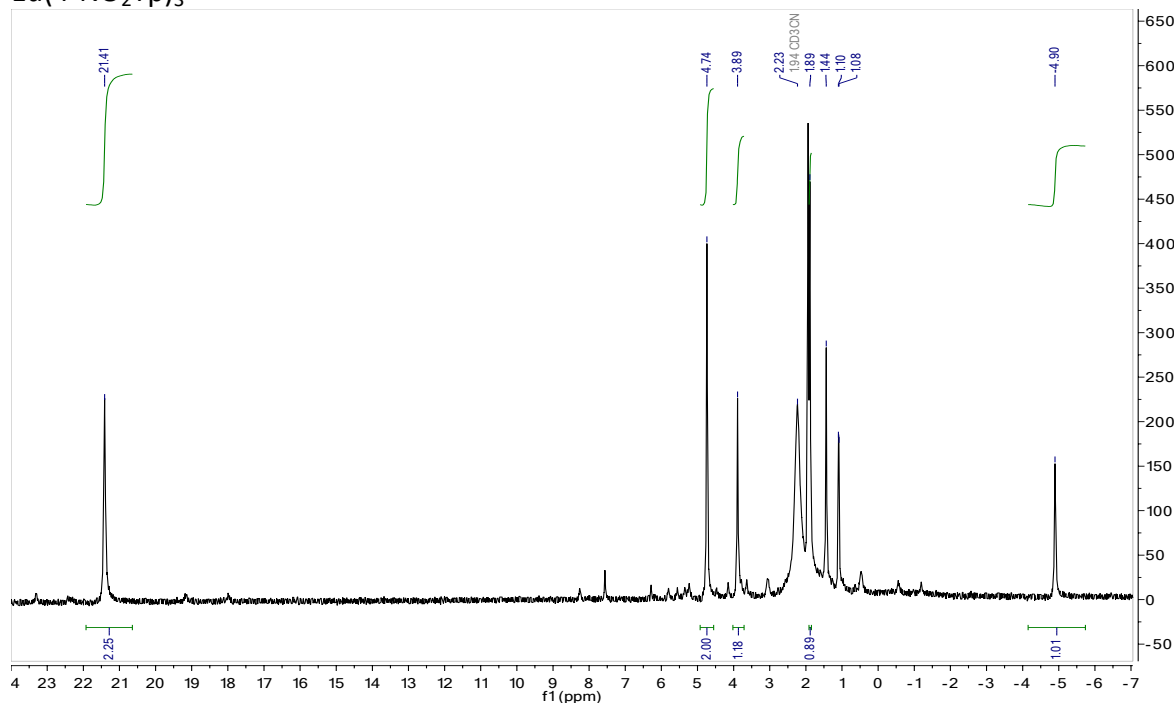

Figure S12: <sup>1</sup>H NMR (400 MHz, acetonitrile-d<sub>3</sub>) of crude Eu(4-NO<sub>2</sub>Tp)<sub>3</sub>. δ (ppm): 21.41 (s, 2H), 4.74 (s, 2H), 3.89 (s, 1H), 2.23 (H<sub>2</sub>O), 1.94 (CD<sub>2</sub>H<sub>2</sub>CN), 1.89 (s, 1H), 1.44 (cyclohexane), 1.10 (iPrOH) and -4.90 (s, 1H). Low intensity peaks correspond to trace amounts of [TBA]<sup>+</sup>, iPrOH and MeOH. δ = 21.41, 4.74, 3.89, 1.89, -4.90 ppm correspond to Eu(4-NO<sub>2</sub>Tp)<sub>3</sub>.



### Gd(4-NO<sub>2</sub>Tp)<sub>3</sub>

Relaxation time was too fast to observe the peaks from this complex.

### Tb(4-NO<sub>2</sub>Tp)<sub>3</sub>

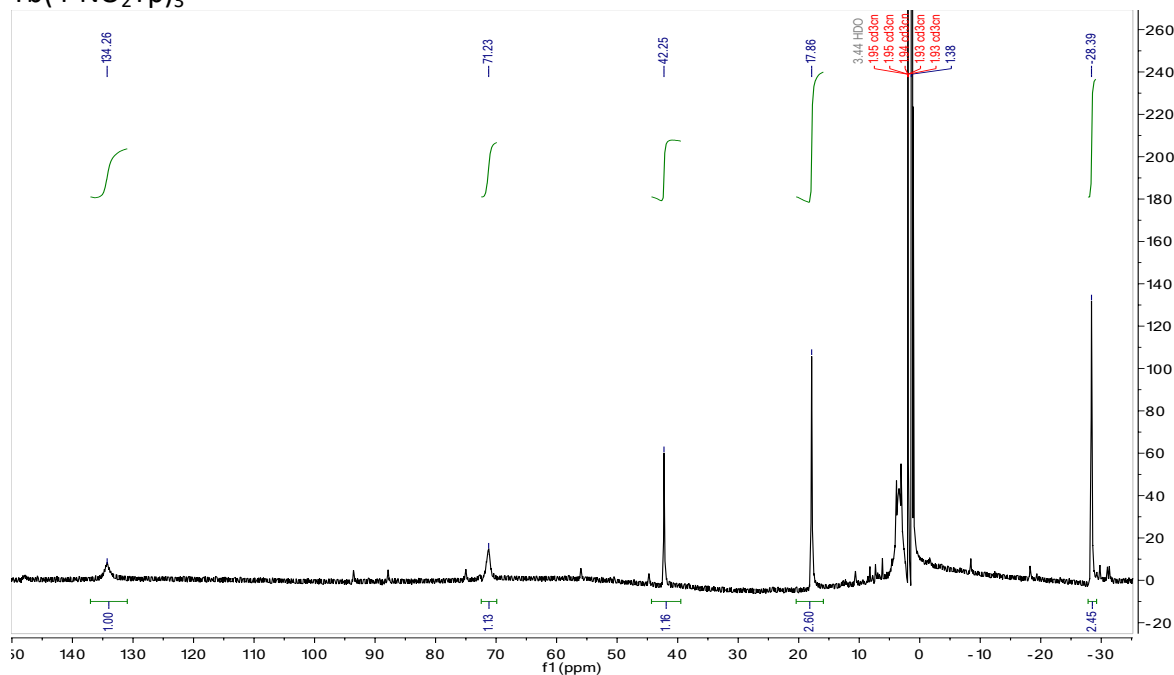

Figure S13: <sup>1</sup>H NMR (400 MHz, acetonitrile-d<sub>3</sub>) of crude Tb(4-NO<sub>2</sub>Tp)<sub>3</sub>. δ (ppm): 134.26 (s, 1H), 71.23 (s, 1H), 42.25 (s, 1H), 17.86 (s, 2H), 3.42 (H<sub>2</sub>O), 1.94 (CD<sub>2</sub>H<sub>2</sub>N), 1.38 (cyclohexane) and -28.39 (s, 2H). Low intensity peaks correspond to trace amounts of [TBA]<sup>+</sup>, <sup>1</sup>PrOH and MeOH. δ = 134.26, 71.23, 42.25, 17.86, -28.39 ppm correspond to Tb(4-NO<sub>2</sub>Tp)<sub>3</sub>.

### Dy(4-NO<sub>2</sub>Tp)<sub>3</sub>

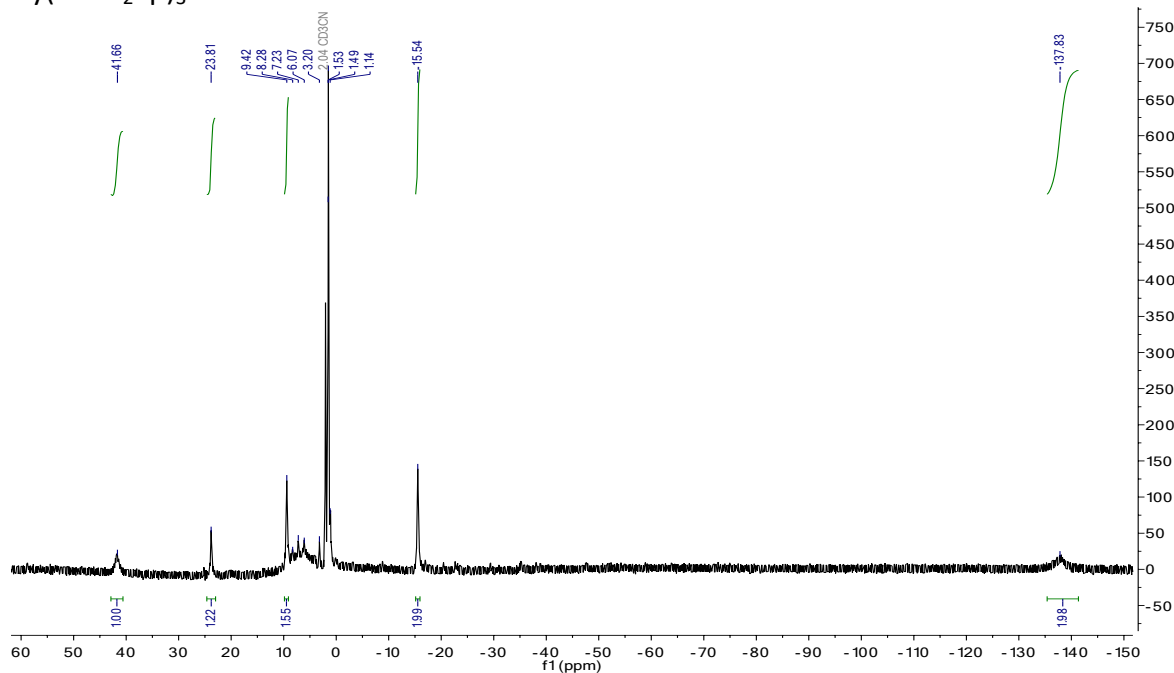

Figure S14: <sup>1</sup>H NMR (400 MHz, acetonitrile-d<sub>3</sub>) of crude Dy(4-NO<sub>2</sub>Tp)<sub>3</sub>. δ (ppm) 41.66 (s, 1H), 23.81 (s, 1H), 9.42 (s, 1H), 2.04 (CD<sub>2</sub>H<sub>2</sub>N), 1.49 (cyclohexane), -15.54 (s, 2H) and -137.83 (s, 2H). Low intensity peaks at 8.28, 7.23, 6.07, 3.20, 1.53, and 1.14 ppm correspond to trace amounts of [TBA][4-NO<sub>2</sub>Tp]. δ = 41.66, 23.81, 9.42, -15.54 and -137.83 ppm correspond to Dy(4-NO<sub>2</sub>Tp)<sub>3</sub>.

## Thermogravimetric Analysis

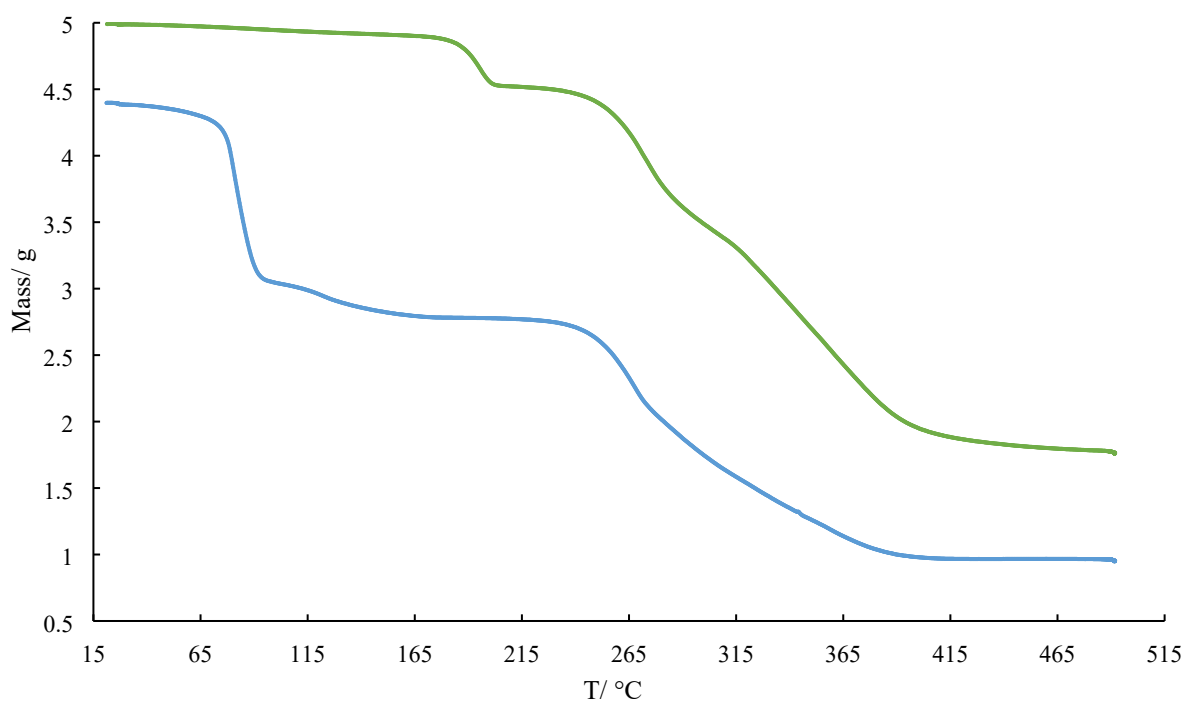

Figure S15: TGA curves of **5a** (top, green) and **5b** (bottom, blue). **5a** features a mass loss of 9 % from 174 – 204 °C assigned as loss of lattice hexanes (*theoretical mass loss* = 8.5 %). **5b** has a major mass loss of 37 % from 70 – 170 °C assigned to the loss of lattice benzene molecules (*theoretical mass loss* = 37 %). Mass losses are consistent with the assigned number of hexanes (1) and benzene (7) in reported chemical formulae.

## Diffuse Reflectance Spectra

K[4-NO<sub>2</sub>Tp]

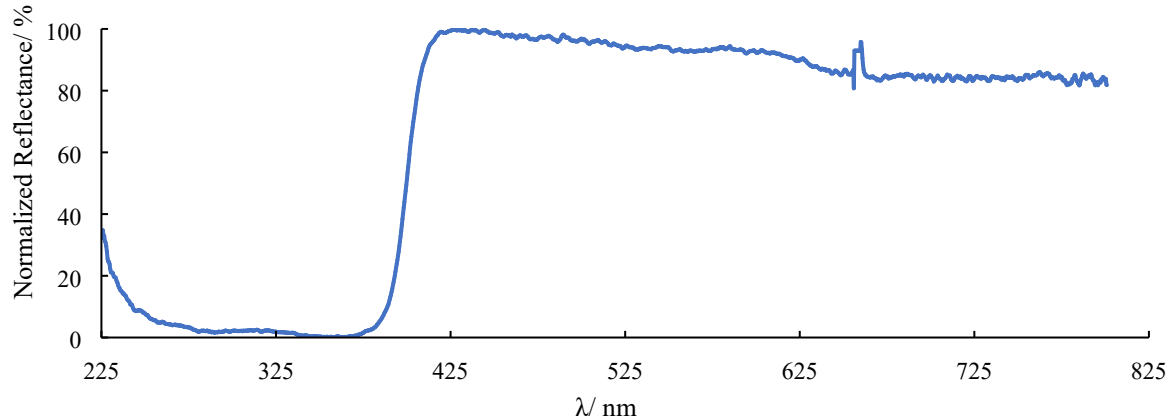

Figure S16: DRS of K[4-NO<sub>2</sub>Tp] with absorption band from 225 to 425 nm.

**1a**

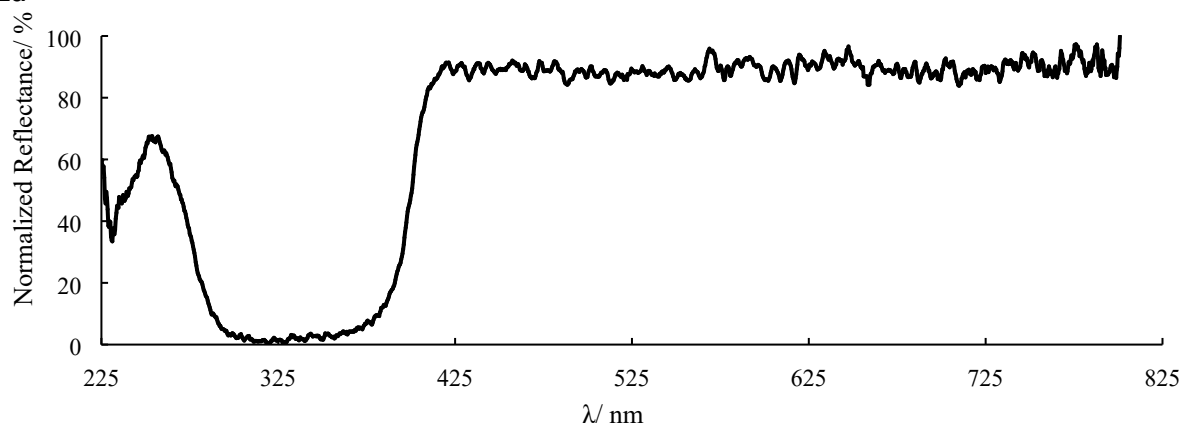

Figure S17: DRS of **1a**(La) with absorption band from 255 to 425 nm.

**2a**

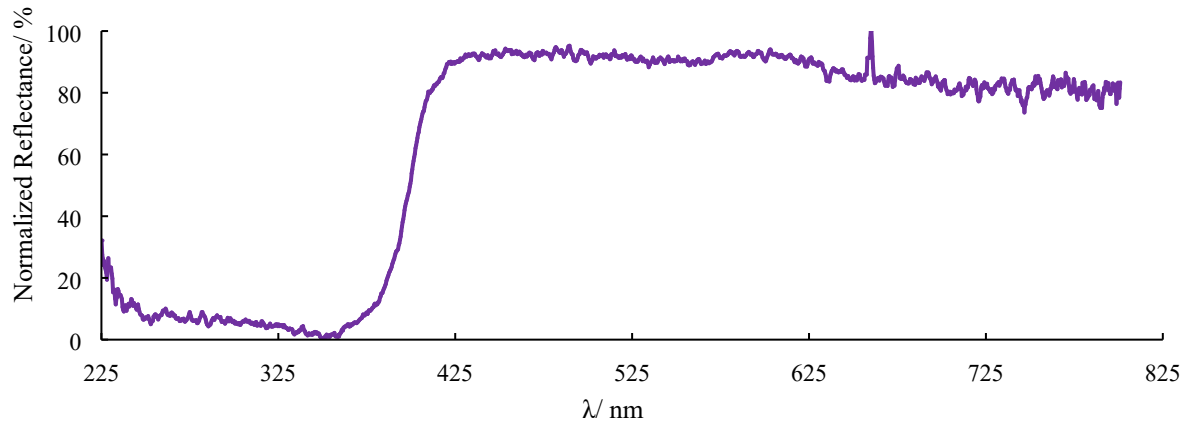

Figure S18: DRS of **2a**(Ce) with absorption band from 225 to 425 nm.

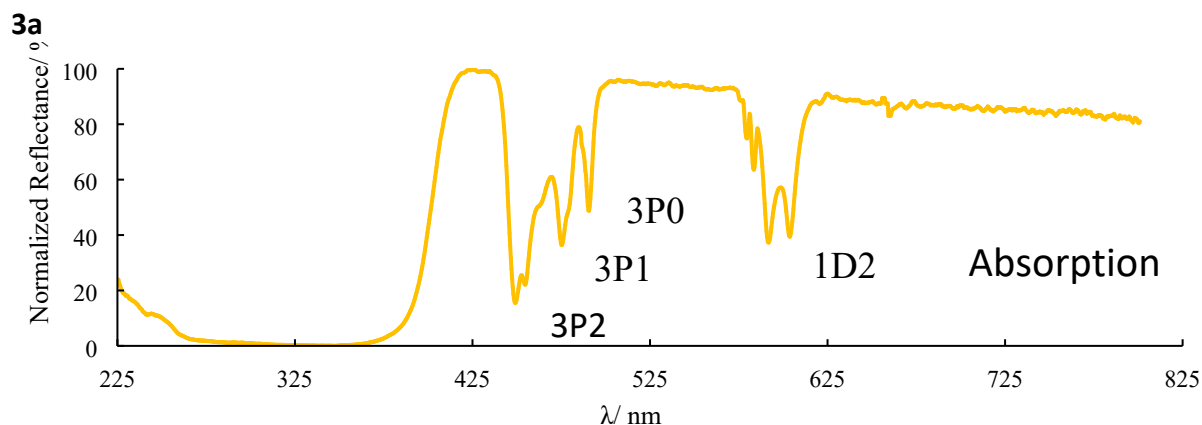

Figure S19: DRS of **3a**(Pr) with absorption band from 225 to 425 nm of 4-NO<sub>2</sub>Tp<sup>-</sup> with direct Pr<sup>3+</sup> absorptions from the <sup>3</sup>H<sub>4</sub> ground state to <sup>25+1</sup>L<sub>J</sub> at 449 nm (<sup>3</sup>P<sub>0</sub>), 476 nm (<sup>3</sup>P<sub>1</sub>) and 491 nm (<sup>3</sup>P<sub>0</sub>) and 591 and 604 nm (<sup>1</sup>D<sub>2</sub>).

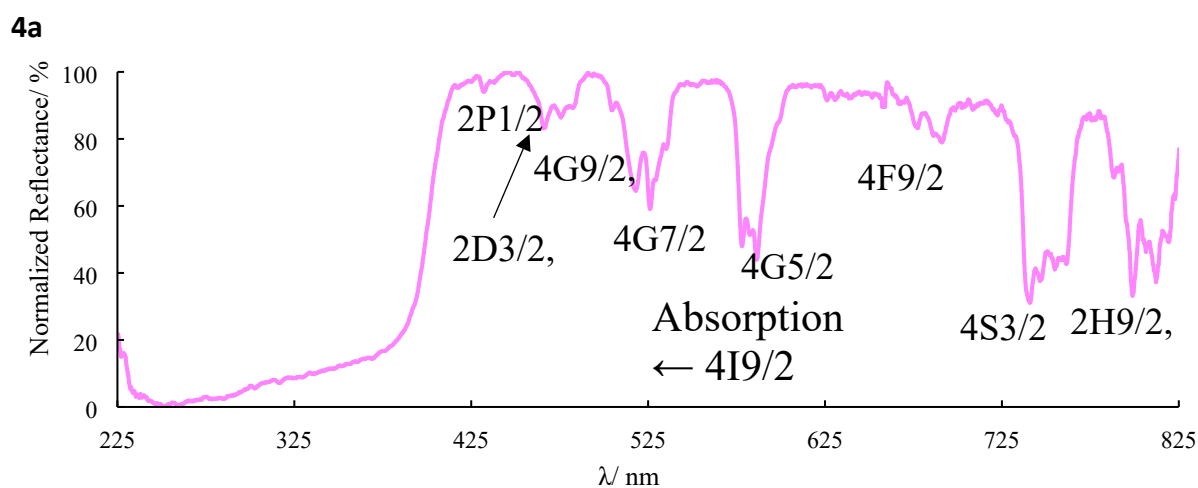

Figure S20: DRS of **4a**(Nd) with absorption band from 225 to 425 nm of 4-NO<sub>2</sub>Tp<sup>-</sup> with direct Nd<sup>3+</sup> absorptions from the <sup>4</sup>I<sub>9/2</sub> ground state to <sup>25+1</sup>L<sub>J</sub> at 432 nm (<sup>2</sup>P<sub>1/2</sub>), 466 nm (<sup>2</sup>D<sub>3/2</sub>, <sup>2</sup>G<sub>9/2</sub>), 525 nm (<sup>4</sup>G<sub>9/2</sub>, <sup>2</sup>K<sub>15/2</sub>), 527 nm (<sup>4</sup>G<sub>7/2</sub>), 587 nm (<sup>4</sup>G<sub>5/2</sub>), 692 nm (<sup>4</sup>F<sub>9/2</sub>), 740 nm (<sup>4</sup>S<sub>3/2</sub>) and 799 nm (<sup>2</sup>H<sub>9/2</sub>, <sup>4</sup>F<sub>5/2</sub>).

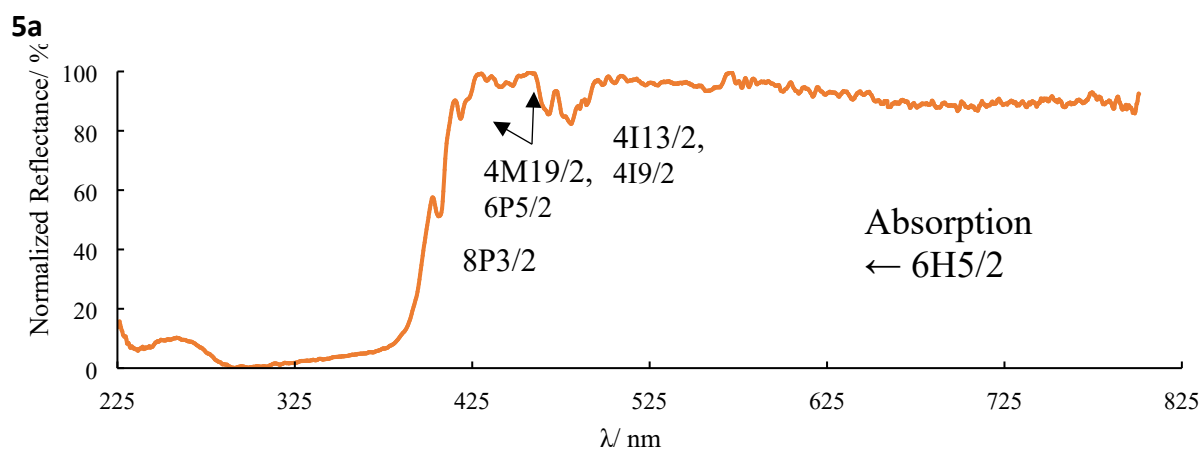

Figure S 21: DRS of **5a**(Sm) with absorption band from 225 to 425 nm of 4-NO<sub>2</sub>Tp<sup>-</sup> with direct Sm<sup>3+</sup> absorptions from the <sup>6</sup>H<sub>5/2</sub> ground state to <sup>25+1</sup>L<sub>J</sub> at 407 nm (<sup>8</sup>P<sub>3/2</sub>), 419 nm (<sup>4</sup>M<sub>19/2</sub>), 442 nm (<sup>6</sup>P<sub>5/2</sub>) and 468 nm (<sup>4</sup>I<sub>13/2</sub>) and 480 nm (<sup>4</sup>I<sub>9/2</sub>).

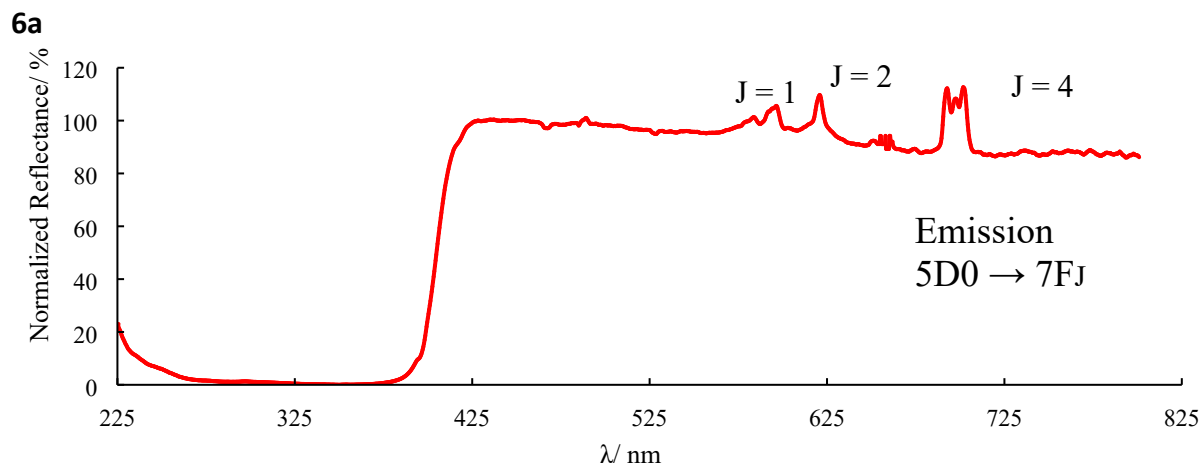

Figure S22: DRS of **6a**(Eu) with absorption band from 225 to 425 nm of 4-NO<sub>2</sub>Tp<sup>-</sup> with emission from Eu<sup>3+</sup> (<sup>5</sup>D<sub>0</sub>  $\rightarrow$  <sup>7</sup>F<sub>J</sub>) at 598 nm (J = 1), 622 nm (J = 2) and 693 nm (J = 4).

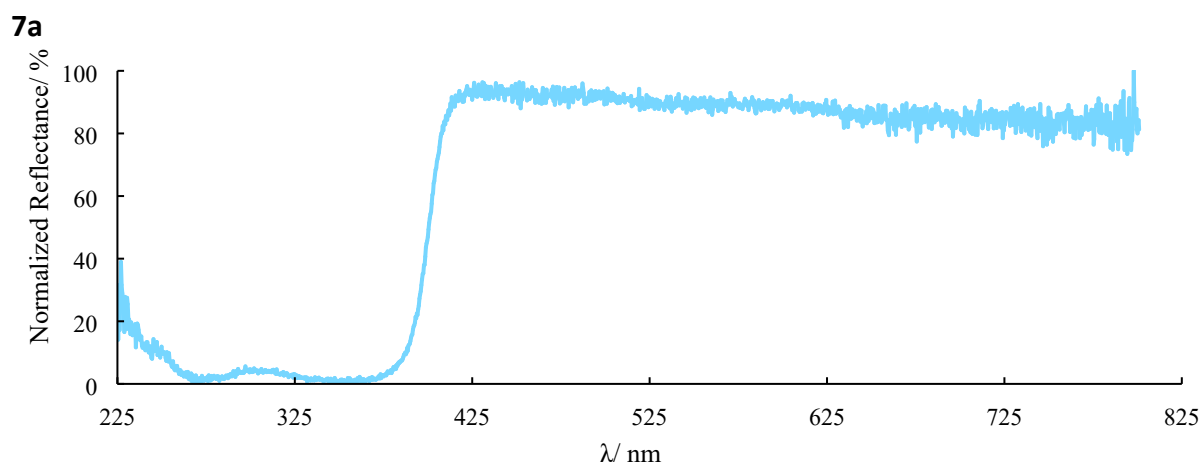

Figure S23: DRS of **7a**(Gd) with absorption band from 225 to 425 nm.

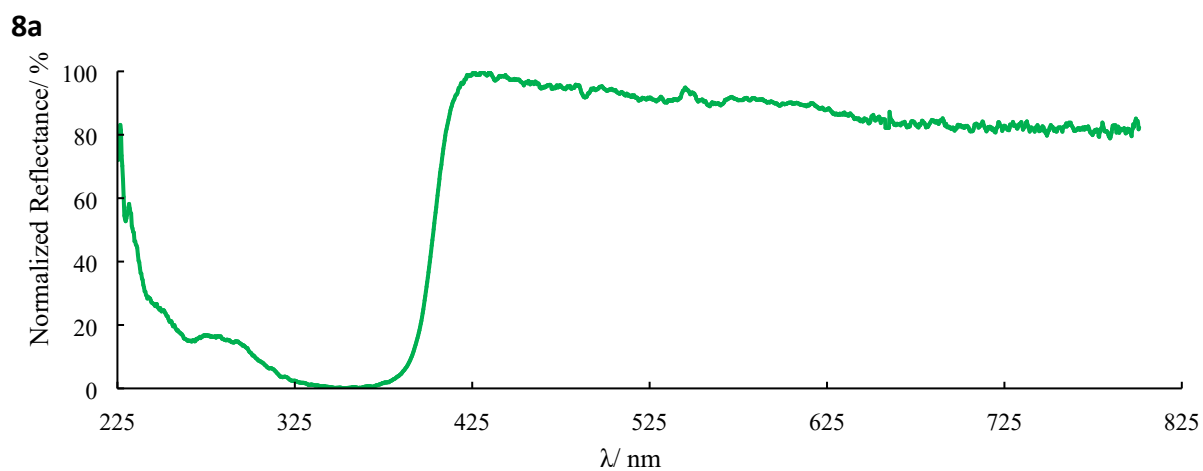

Figure S24: DRS of **8a**(Tb) with absorption band from 225 to 425 nm.

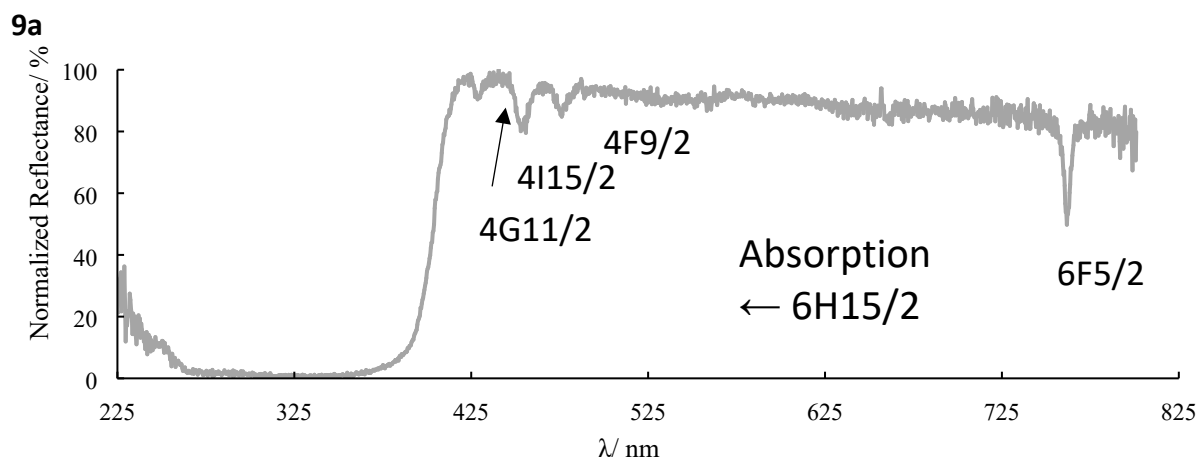

Figure S25: DRS of **9a**(Dy) with absorption band from 225 to 425 nm of 4-NO<sub>2</sub>Tp<sup>-</sup> with direct Dy<sup>3+</sup> absorptions from the <sup>6</sup>H<sub>15/2</sub> ground state to <sup>25+1</sup>L<sub>J</sub> at 429 nm (<sup>4</sup>G<sub>11/2</sub>), 456 nm (<sup>4</sup>I<sub>15/2</sub>), 476 nm (<sup>4</sup>F<sub>9/2</sub>) and 761 nm (<sup>6</sup>F<sub>5/2</sub>).

## Computational Details

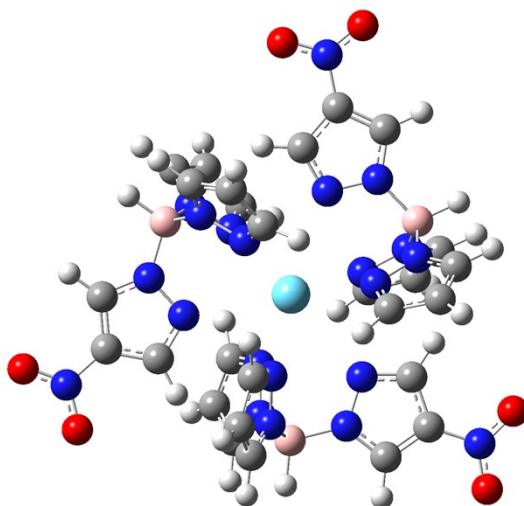

|    |             |             |             |
|----|-------------|-------------|-------------|
| La | 9.74887600  | 5.72414700  | 17.11949600 |
| C  | 9.52827200  | 1.88116400  | 17.73035400 |
| H  | 10.60090000 | 1.84319100  | 17.66922400 |
| O  | 10.13837000 | -0.86986000 | 18.11648600 |
| N  | 7.53346800  | 2.69744200  | 17.72863300 |
| B  | 6.44237600  | 3.78540900  | 17.62709300 |
| H  | 5.36827500  | 3.27733600  | 17.77279100 |
| C  | 8.63535600  | 0.82444000  | 17.94931100 |
| O  | 8.02526100  | -1.33347700 | 18.32081100 |
| N  | 8.85405700  | 3.01198000  | 17.59771200 |
| B  | 13.12648800 | 3.84457500  | 17.20794400 |
| H  | 14.11740500 | 3.17437200  | 17.25245900 |
| B  | 9.67836400  | 9.54554500  | 16.53596600 |
| H  | 9.76200300  | 10.72512500 | 16.34974400 |
| N  | 6.48693000  | 4.42387800  | 16.21554400 |
| O  | 15.31778300 | 9.30365700  | 16.22411600 |
| C  | 7.37087200  | 1.38869600  | 17.94093700 |

|   |             |             |             |
|---|-------------|-------------|-------------|
| H | 6.40388100  | 0.93639700  | 18.07088000 |
| C | 7.24787100  | 5.39682700  | 14.44591600 |
| H | 7.95512700  | 5.92741400  | 13.82822900 |
| N | 7.58433900  | 5.02455700  | 15.68312200 |
| O | 16.79855700 | 7.72193500  | 16.38949300 |
| C | 5.93054200  | 5.03553100  | 14.15675300 |
| H | 5.38099600  | 5.20095400  | 13.24699600 |
| N | 6.64526400  | 4.82045900  | 18.76250900 |
| O | 3.78929000  | 8.73964800  | 17.02596000 |
| C | 5.48693600  | 4.42034900  | 15.31108400 |
| H | 4.53294600  | 3.98281700  | 15.55114800 |
| N | 7.78720200  | 5.53404400  | 18.94963800 |
| O | 4.42220600  | 10.78924400 | 16.67882100 |
| C | 5.76286400  | 5.11018700  | 19.74000000 |
| H | 4.79547000  | 4.63819000  | 19.76204500 |
| N | 12.57604300 | 6.29152800  | 16.85482100 |
| C | 6.33148600  | 6.03855400  | 20.59005900 |
| H | 5.89361100  | 6.48268300  | 21.46642000 |
| N | 13.52309400 | 5.31523400  | 16.95440500 |
| N | 8.95427500  | -0.55361500 | 18.14207900 |
| C | 7.59656600  | 6.27060000  | 20.04672800 |
| H | 8.36318700  | 6.95066400  | 20.38297900 |
| N | 11.28685800 | 4.43052000  | 18.90759000 |
| C | 14.60063500 | 7.18166700  | 16.59897300 |
| N | 12.40877400 | 3.73722500  | 18.57732800 |
| C | 13.22200500 | 7.42604000  | 16.63911400 |
| H | 12.70928600 | 8.36347600  | 16.52064700 |
| N | 11.08768100 | 3.91934800  | 15.64094300 |
| C | 11.00629300 | 4.11343600  | 20.17379000 |
| H | 10.13130300 | 4.52221000  | 20.65393400 |
| N | 12.25440800 | 3.33996200  | 16.03031900 |
| C | 14.75052200 | 5.82058400  | 16.80476700 |
| H | 15.63814900 | 5.21507400  | 16.84939100 |
| C | 11.94691800 | 3.21653700  | 20.68391300 |
| H | 11.98504500 | 2.78214700  | 21.66720900 |
| N | 15.64366700 | 8.13363200  | 16.38993300 |
| N | 8.19016200  | 9.16291500  | 16.68841900 |
| C | 12.81856200 | 3.00589300  | 19.63336700 |
| H | 13.69784500 | 2.38850300  | 19.56385700 |
| N | 7.81599200  | 7.86972600  | 16.90655100 |
| C | 10.66644700 | 3.23863400  | 14.57245800 |
| H | 9.73294100  | 3.49738500  | 14.09823000 |
| C | 11.55821600 | 2.21380000  | 14.25005100 |
| H | 11.48897400 | 1.50144600  | 13.44706100 |
| N | 10.43024400 | 9.20932200  | 17.84881800 |
| N | 10.26850400 | 8.81833700  | 15.30101900 |
| C | 6.49537500  | 7.86577300  | 16.98924900 |
| H | 5.93469700  | 6.96452100  | 17.15979400 |
| C | 12.55154400 | 2.31655100  | 15.20423000 |
| H | 13.44505500 | 1.73452400  | 15.35270500 |

|   |             |             |             |
|---|-------------|-------------|-------------|
| N | 10.47529600 | 7.97053300  | 18.40731000 |
| N | 10.27194400 | 7.46842200  | 15.13930700 |
| C | 6.01008500  | 9.16915400  | 16.82323800 |
| N | 4.64786200  | 9.59552100  | 16.84402500 |
| C | 7.12536200  | 9.96763300  | 16.63352100 |
| H | 7.20524300  | 11.02735800 | 16.46886300 |
| C | 11.16477900 | 8.09378400  | 19.54392700 |
| H | 11.36075800 | 7.22737800  | 20.15561200 |
| C | 11.56935600 | 9.41541300  | 19.74150800 |
| H | 12.13674900 | 9.82076800  | 20.56052000 |
| C | 11.08017700 | 10.08785000 | 18.63864900 |
| H | 11.14976400 | 11.12592700 | 18.36169800 |
| C | 10.81037400 | 7.23328100  | 13.94047500 |
| H | 10.94853200 | 6.22004200  | 13.59760400 |
| C | 11.15574500 | 8.42783400  | 13.30539700 |
| H | 11.60610500 | 8.55919000  | 12.33744000 |
| C | 10.79329600 | 9.40840000  | 14.20809400 |
| H | 10.87266100 | 10.48050400 | 14.14944700 |

Figure S26: B3LYP optimized ground state structure of and xyz coordinates for **Calc-1**. The global energy minimum for **Calc-1** was -2753.56 hartrees. No imaginary frequencies were generated using this model.

Table S1: TD-DFT B3LYP/def2-tzvp transitions for calculated excited states corresponding to UV-VIS and luminescence excitation bands.

| Transition            | Energy   | Donor → Acceptor | Coefficient | Contribution | Oscillation |
|-----------------------|----------|------------------|-------------|--------------|-------------|
| $S_0 \rightarrow S_1$ | 314      | 187 → 206        | 0.22848     | 11%          | 0.000       |
|                       |          | 188 → 206        | -0.17307    | 7%           |             |
|                       |          | 188 → 207        | 0.38406     | 32%          |             |
|                       |          | 188 → 208        | 0.13366     | 4%           |             |
|                       |          | 189 → 207        | -0.12677    | 4%           |             |
|                       |          | 189 → 208        | -0.36474    | 29%          |             |
|                       |          | 195 → 207        | -0.12171    | 3%           |             |
|                       |          | 196 → 206        | -0.13392    | 4%           |             |
|                       |          | 196 → 207        | 0.16549     | 6%           |             |
| $S_0 \rightarrow S_7$ | 276 nm   | 203 → 206        | -0.17275    | 6%           | 0.0161      |
|                       |          | 203 → 207        | 0.21569     | 10%          |             |
|                       |          | 204 → 206        | 0.21297     | 10%          |             |
|                       |          | 205 → 207        | 0.40914     | 36%          |             |
|                       |          | 205 → 208        | 0.42692     | 39%          |             |
| $S_0 \rightarrow T_1$ | 404 nm   | 179 → 206        | 0.43530     | 41%          | 0.000       |
|                       |          | 179 → 208        | 0.22197     | 11%          |             |
|                       |          | 180 → 206        | -0.15601    | 5%           |             |
|                       |          | 180 → 207        | 0.17855     | 7%           |             |
|                       |          | 181 → 206        | 0.21409     | 10%          |             |
|                       |          | 181 → 207        | 0.11750     | 3%           |             |
|                       |          | 181 → 208        | 0.30976     | 21%          |             |
| 185 → 206             | -0.12354 | 3%               |             |              |             |



## Judd-Ofelt Analysis

Table 2: Judd-Ofelt parameters for **6a** and several Eu<sup>3+</sup> complexes

| Compound                                                              | Site Symmetry | $\Omega_2/ \times 10^{-20} \text{ cm}^2$ | $\Omega_4/ \times 10^{-20} \text{ cm}^2$ | $\Omega_6/ \times 10^{-20} \text{ cm}^2$ |
|-----------------------------------------------------------------------|---------------|------------------------------------------|------------------------------------------|------------------------------------------|
| <b>6a</b>                                                             | $D_{3h}$      | 1.2                                      | 10.3                                     | N/A                                      |
| [Eu <sub>2</sub> (MELL)(H <sub>2</sub> O) <sub>6</sub> ] <sup>2</sup> | $D_{3h}$      | 11.82                                    | 2.72                                     | N/A                                      |
| [Eu(DPA)] <sup>3-, 3</sup>                                            | $D_{3h}$      | 10.5                                     | 5.31                                     | 8.32                                     |
| (BMIm) <sub>2</sub> [Eu(Pic) <sub>5</sub> ] <sup>4</sup>              | $C_{4v}$      | 15.1                                     | 13.9                                     | N/A                                      |
| (BEIm) <sub>2</sub> [Eu(Pic) <sub>5</sub> ] <sup>4</sup>              | $C_{4v}$      | 12.0                                     | 10.3                                     | N/A                                      |
| (BBIm) <sub>2</sub> [Eu(Pic) <sub>5</sub> ] <sup>4</sup>              | $C_{4v}$      | 9.6                                      | 9.2                                      | N/A                                      |

$\alpha$  – Determined using JOES<sup>5</sup> with an assumed refractive index of 1.5.

MELL – mellitic acid, DPA – dipicolinic acid, pic – picric acid, BMIM – 1-butyl,3-methylimidazolium, BEIM – 1-butyl,3-ethylimidazolium, BBIM – 1,3-dibutylimidazolium

The intensity of the hypersensitive  $^5D_0 \rightarrow ^7F_2$  transition can be used as a measure of the effect of the ligand field on Eu<sup>3+</sup> and the JO parameter,  $\Omega_2$  is a numerical representation of said LF influence, aka covalency of Eu<sup>3+</sup>—4-NO<sub>2</sub>Tr<sup>-</sup> bond.  $\Omega_2$  is associated with a dynamic coupling mechanism between the electric field of Ln<sup>3+</sup> and the electric dipole of the ligand induced by the  $f$ -orbitals of Ln<sup>3+</sup>. (see references 48 – 51 from the main text)

## DC SQUID Data Fits and Parameters

Simulation of the temperature-dependent susceptibility data were accomplished using the PHI software.<sup>6</sup> The  $|L, m_L, S, m_S\rangle$  basis was used to describe the lanthanoid centers, and, given the local  $D_{3h}$  geometry of the coordination sphere, the crystal field was described by the Hamiltonian

$$\hat{H}_{CF} = B_2^0 \theta_2 \hat{O}_2^0 + B_4^0 \theta_4 \hat{O}_4^0 + B_6^0 \theta_6 \hat{O}_6^0 + B_6^6 \theta_6 \hat{O}_6^6$$

where  $B_k^q$  are the crystal field parameters (including orbital reduction parameters),  $\theta_k$  are the operator equivalent factors and  $\hat{O}_k^q$  the Stevens operator equivalents.<sup>6-7</sup>

For each complex, a full survey of the full  $B_k^q$  space between -5000 and +5000  $\text{cm}^{-1}$  was conducted. The best fit between experimental data and simulation were scattered over the whole range for  $B_2^0$  and  $B_4^0$  but almost exclusively concentrated around 0 for  $B_6^0$  and  $B_6^6$ . Therefore, in all further investigations,  $B_6^0$  and  $B_6^6$  were set to 0. The  $(B_2^0, B_4^0)$  space was surveyed in more detail, with the result represented Figure S27: Residual between experimental  $\chi_m T$  data and simulation on a logarithmic scale for **4a**. Figure S27 - Figure S29.

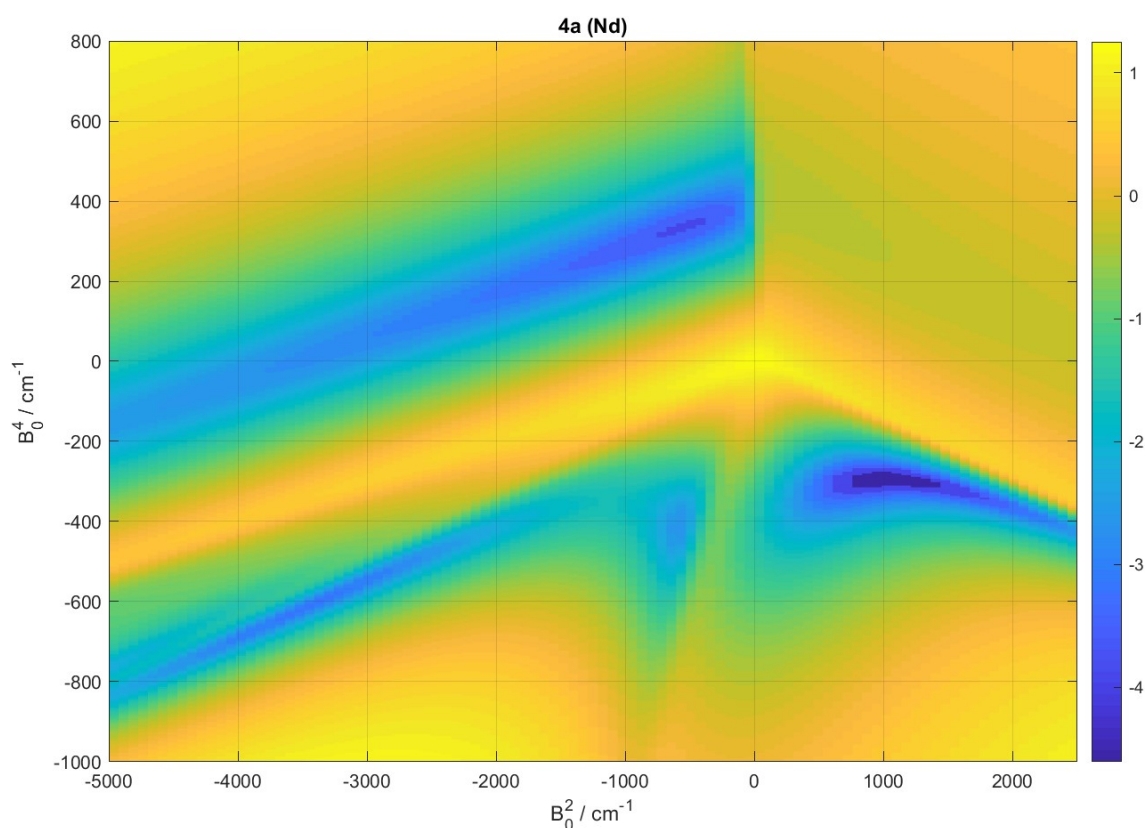

Figure S27: Residual between experimental  $\chi_m T$  data and simulation on a logarithmic scale for **4a**.

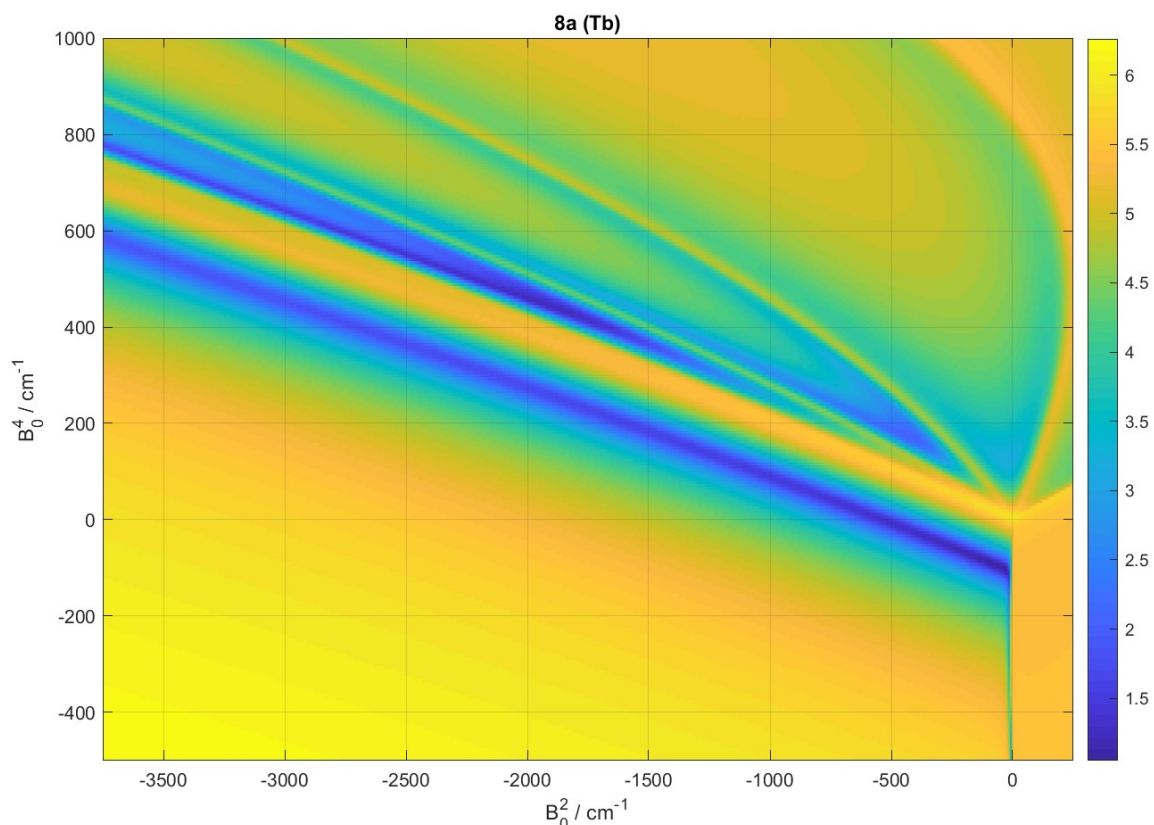

Figure S28: Residual between experimental  $\chi_m T$  data and simulation on a logarithmic scale for **8a**.

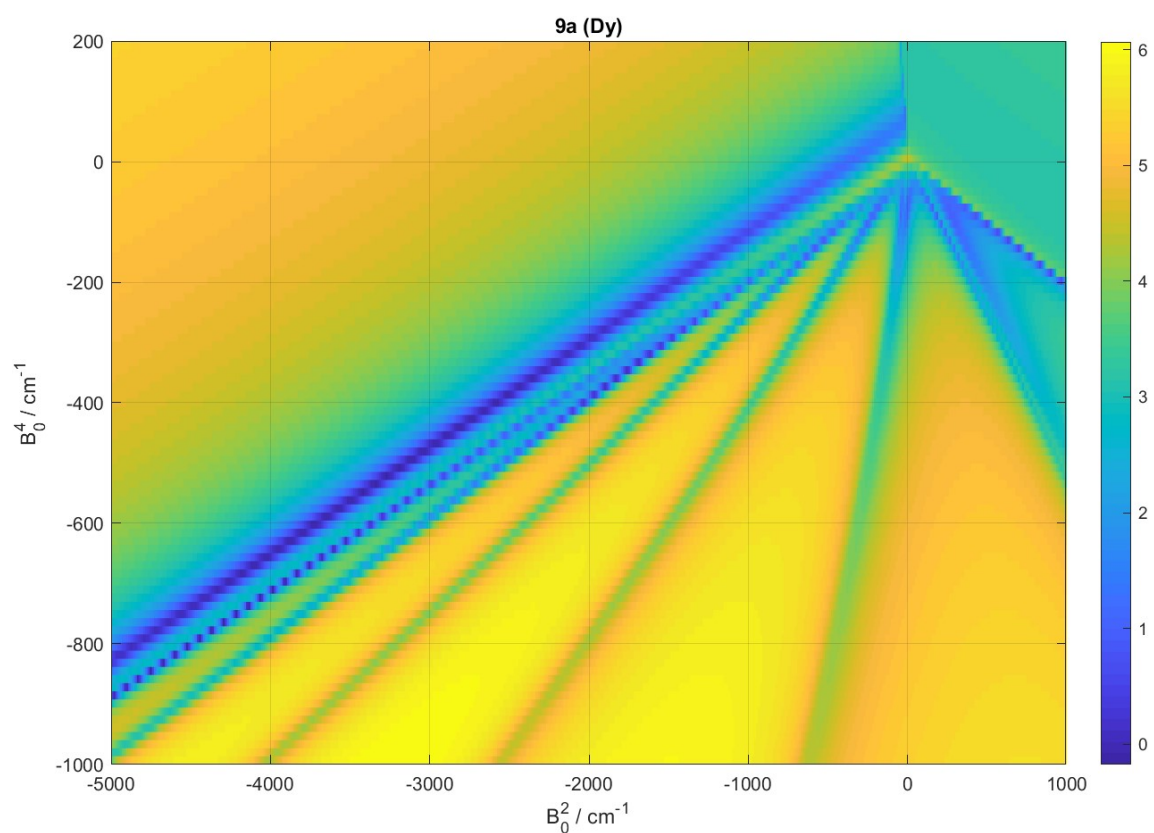

Figure S29: Residual between experimental  $\chi_m T$  data and simulation on a logarithmic scale for **9a**.

Contours plots of all three surfaces were superimposed () to allow the search of sets of crystal field parameters following a linear relationship with the number of 4f electrons in the complexes. Of the various combination of parameters investigated, only two gave satisfactory fits with the experimental data, and were manually optimized to give the two parameter sets (sets 1 and 2 on Figure S30 below) reported in the article.

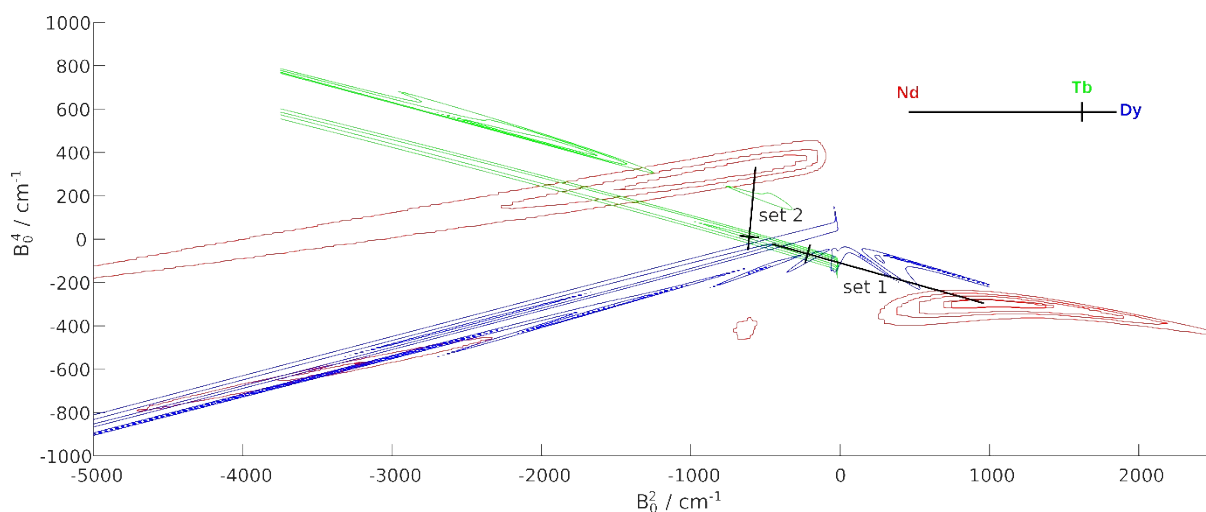

Figure S30: Contour plot corresponding to the surfaces represented in Figure S27 - Figure S29. The dagger marker is constrained at a 5:1 ratio to obtain a linear relationship between the crystal field parameters and the number of f electrons in the complex. The two best sets of parameters are marked on the figure.

## AC SQUID Data Fits and Parameters

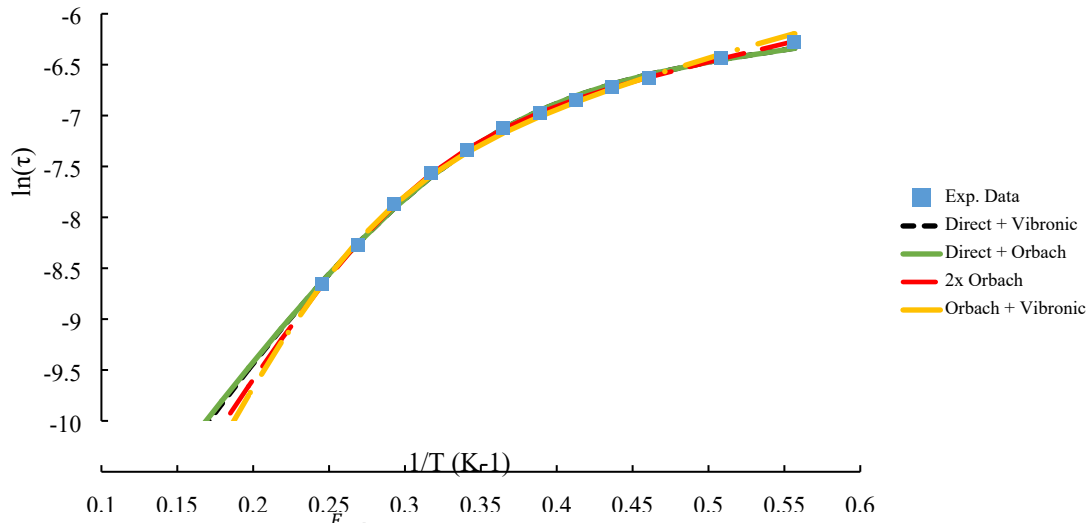

$$\tau^{-1} = AT + \tau_0^{-1} \frac{e^{-\frac{E_{vib}}{k_B T}}}{\left(e^{\frac{E_{vib}}{k_B T}} - 1\right)^2} \quad (1)$$

$$\tau^{-1} = AT + \tau_0^{-1} e^{-\frac{U_{eff}}{k_B T}} \quad (2)$$

$$\tau^{-1} = \tau_0^{-1} e^{-\frac{U_{eff}}{k_B T}} + \tau_0'^{-1} e^{-\frac{U_{eff}'}{k_B T}} \quad (3)$$

$$\tau^{-1} = AT + \tau_0 e^{-\frac{U_{eff}}{k_B T}} + \tau_0'^{-1} \frac{e^{-\frac{E_{vib}}{k_B T}}}{\left(e^{\frac{E_{vib}}{k_B T}} - 1\right)^2} \quad (4)$$

Figure S31: Arrhenius plot of the magnetic relaxation time for **4a** with curves fits obtained using the equations, 1 – 4.

All of the above equations/models yield a satisfactory fit for the experimental data. Equation 1 was chosen to fit the data given the low value for  $U_{eff} \sim 14 \text{ cm}^{-1}$  from all of the fits, is most likely a vibronic (two-phonons Raman relaxation) process and not a true Orbach barrier. Typical values for a real Orbach process would be  $>100 \text{ cm}^{-1}$ .

## References

1. Apostolidis, C.; Kovács, A.; Morgenstern, A. R., Jean; Walter, Olaf, Tris-{Hydridotris(1-pyrazolyl)borato}lanthanide Complexes: Synthesis, Spectroscopy, Crystal Structure and Bonding Properties. *Inorganics*. **2021**, *9* (6), 44. <https://doi/10.3390/inorganics9060044>.
2. Rodrigues, M. O.; Paz, F. A. A.; Freire, R. O.; de Sá, G. F.; Galembeck, A.; Montenegro, M. C. B. S. M.; Araújo, A. N.; Alves, S., Jr., Modeling, Structural, and Spectroscopic Studies of Lanthanide-Organic Frameworks. *J. Phys. Chem. B*. **2009**, *113* (36), 12181-12188. <https://doi.org/10.1021/jp9022629>.
3. Binnemans, K.; Van Herck, K.; Görrler-Walrand, C., Influence of dipicolinate ligands on the spectroscopic properties of europium(III) in solution. *Chem. Phys. Lett.* **1997**, *266* (3), 297-302. [https://doi.org/10.1016/S0009-2614\(97\)00012-2](https://doi.org/10.1016/S0009-2614(97)00012-2).
4. Borges, A. S.; Dutra, J. D. L.; Freire, R. O.; Moura, R. T., Jr.; Da Silva, J. G.; Malta, O. L.; Araujo, M. H.; Brito, H. F., Synthesis and Characterization of the Europium(III) Pentakis(picrate) Complexes with Imidazolium Counteranions: Structural and Photoluminescence Study. *Inorg. Chem.* **2012**, *51* (23), 12867-12878. <https://doi.org/10.1021/ic301776n>.
5. Ćirić, A.; Stojadinović, S.; Sekulić, M.; Dramićanin, M. D., JOES: An application software for Judd-Ofelt analysis from Eu<sup>3+</sup> emission spectra. *J. Lumin.* **2019**, *205*, 351-356. <https://doi.org/10.1016/j.jlumin.2018.09.048>.
6. Chilton, N. F.; Anderson, R. P.; Turner, L. D.; Soncini, A.; Murray, K. S., PHI: A powerful new program for the analysis of anisotropic monomeric and exchange-coupled polynuclear d- and f-block complexes. *J. Comp. Chem.* **2013**, *34* (13), 1164-1175. <https://doi.org/10.1002/jcc.23234>.
7. Bauer, E.; Rotter, M., MAGNETISM OF COMPLEX METALLIC ALLOYS: CRYSTALLINE ELECTRIC FIELD EFFECTS. In *Properties and Applications of Complex Intermetallics*, pp 183-248.
